# Supplementary material for: Distinguishing between Contact and Administration of Heroin from a Single Fingerprint using High Resolution Mass Spectrometry
Source: PubMed Central journal article supplement (PMC7299524; doi:10.1093/jat/bkz088), 2019-11-04
Supplement: jat-19-2870-file008_bkz088.pdf [file jat-19-2870-file008_bkz088.pdf]

## Costa *et al.*: Supplemental Data

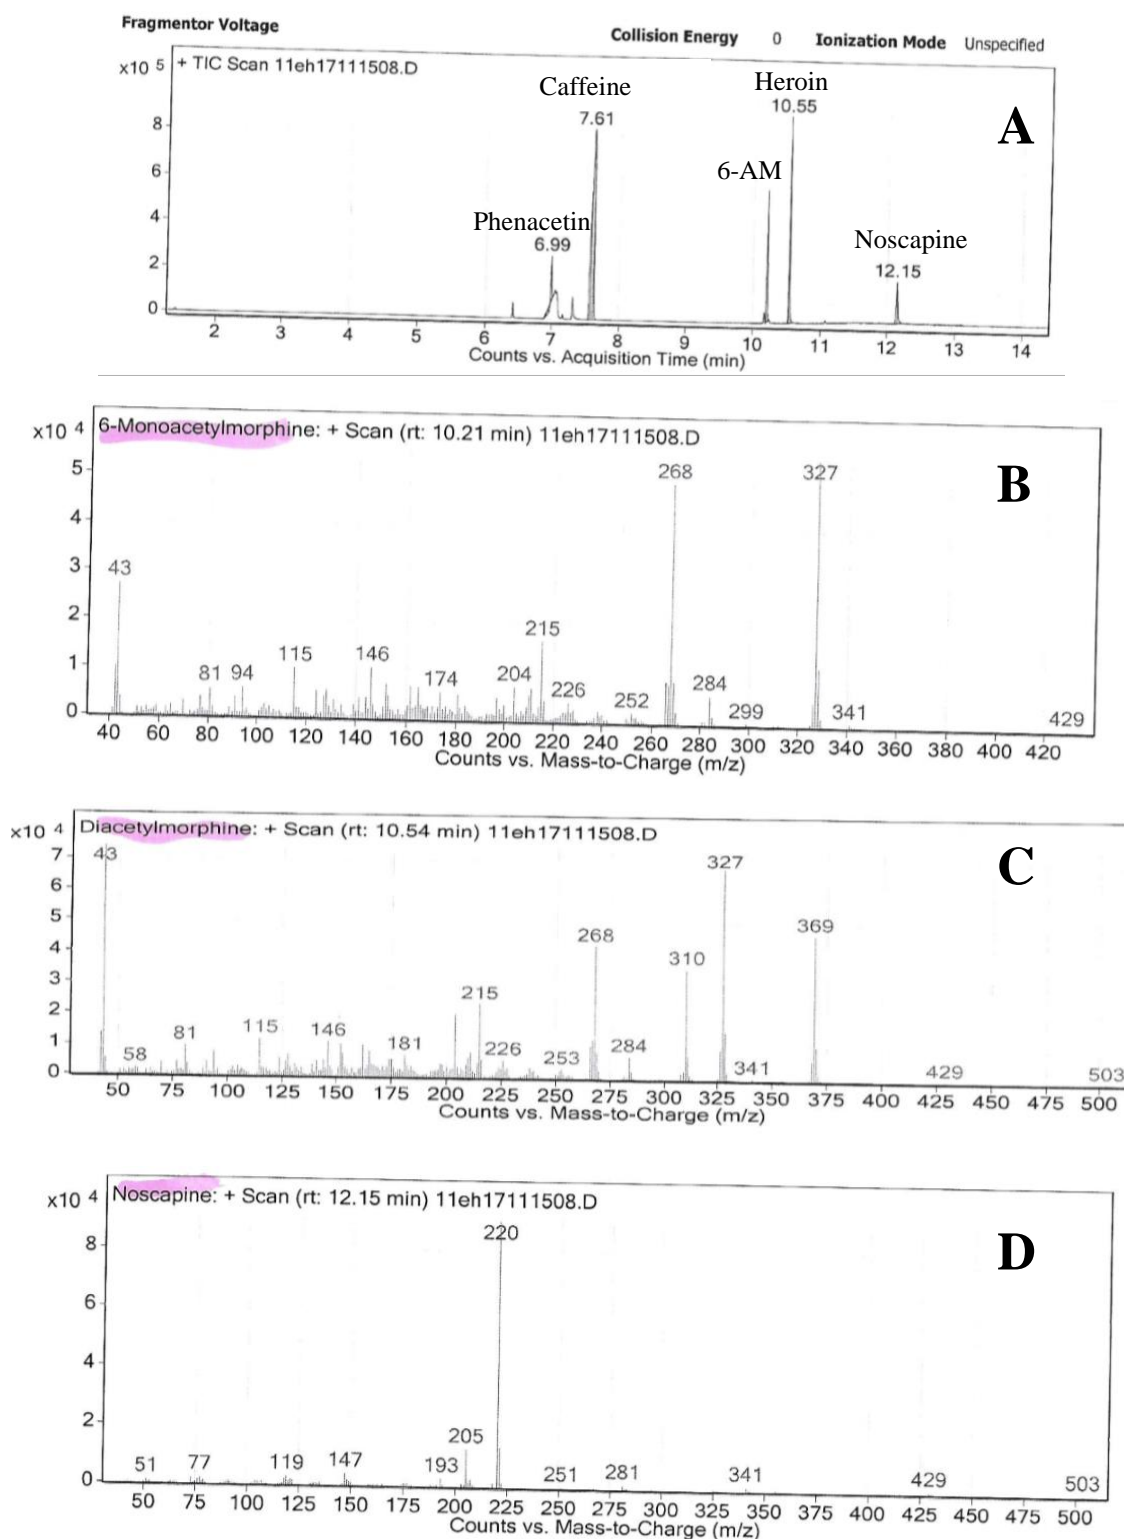

**Supplemental Data Figure 1.** Gas chromatography-mass spectrometry results by Forensic Science Ireland of seized heroin. (A) Total ion chromatogram (TIC) of heroin samples; (B) MS/MS spectrum of 6-monoacetylmorphine (6-AM) peak at retention time 10.21 min; (C) MS/MS spectrum of heroin (diacetylmorphine) peak at retention time 10.54 min; (D) MS/MS spectrum of noscapine peak at retention time 12.15 min.

**Supplemental Data Table 1.** Protonated molecular ion monoisotopic mass and respective retention times for morphine, codeine, acetylcodeine and noscapine.

| <b>Substance</b>     | <b>[M+H]<sup>+</sup></b> | <b>Retention time (min)</b> |
|----------------------|--------------------------|-----------------------------|
| <b>Morphine</b>      | 286.1427                 | 1.62                        |
| <b>Codeine</b>       | 300.1594                 | 1.78                        |
| <b>Acetylcodeine</b> | 342.1700                 | 2.05                        |
| <b>Noscapine</b>     | 414.1547                 | 2.15                        |

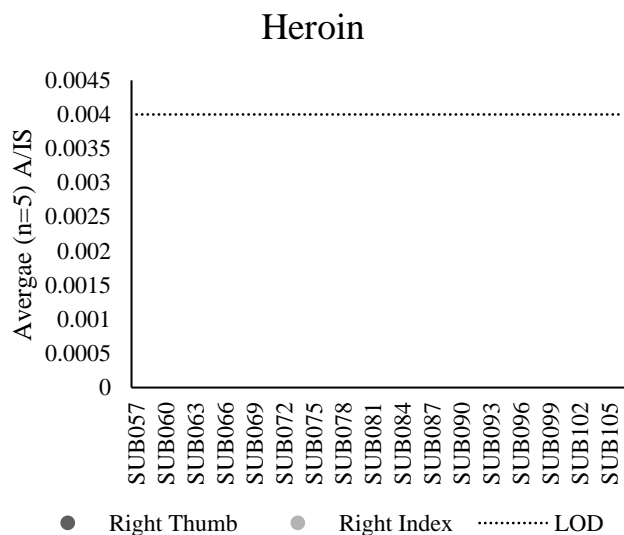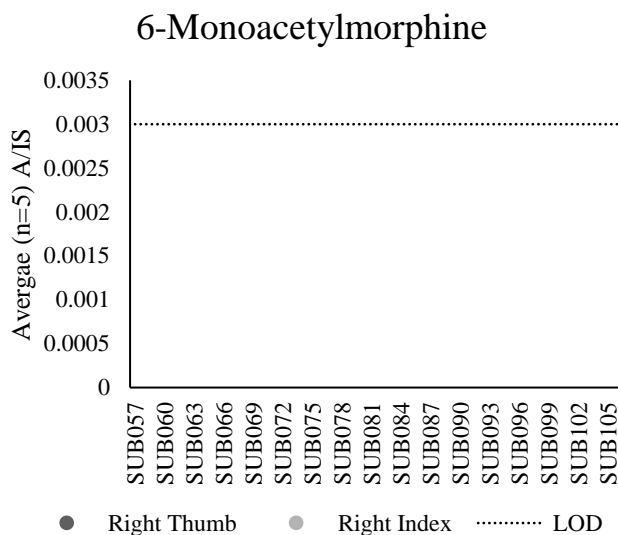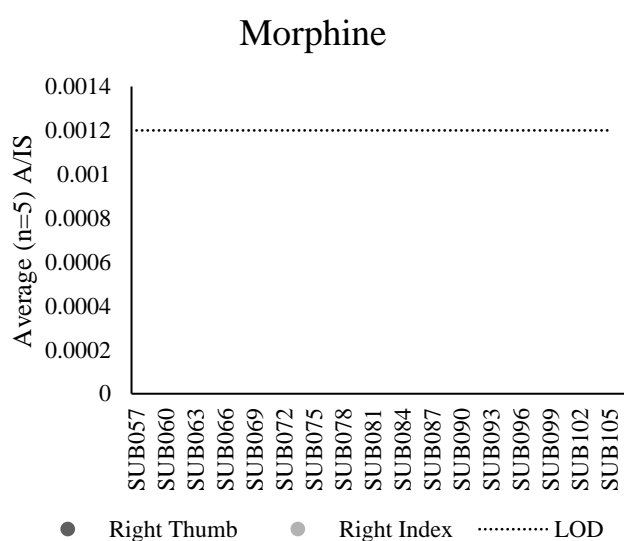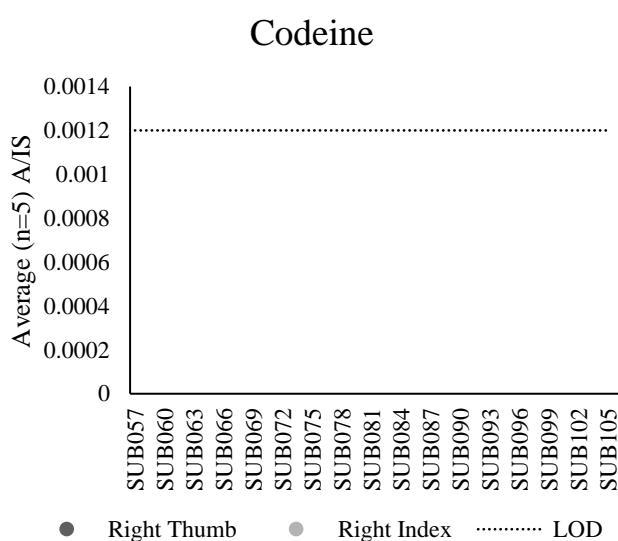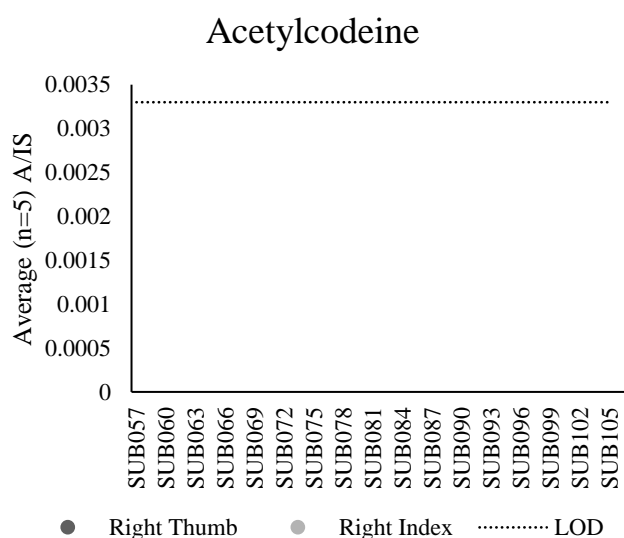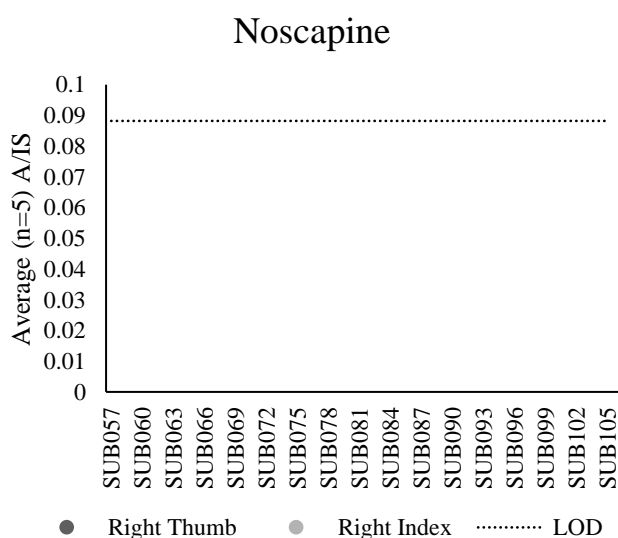

**Supplemental Data Figure 2.** Results from the analysis of fingerprint samples collected from 50 non-drug users after handwashing with soap using LC-MS.

**Supplemental Data Table 2.** Corresponding oral fluid results and patient testimony for fingerprint samples collected from patients at a drug rehabilitation clinic.

|                 | <b>Participant #</b> | <b>Patient Testimony</b>          | <b>Oral Fluid Results</b>                                                       |
|-----------------|----------------------|-----------------------------------|---------------------------------------------------------------------------------|
| <b>Group 1a</b> | <b>41033</b>         | Heroin                            | <i>Positive</i><br>Morphine: >240 ng/mL<br>6-AM: >32 ng/mL<br>Codeine: 74 ng/mL |
|                 | <b>41035</b>         | Heroin                            | <i>Positive</i><br>Morphine: 138 ng/mL<br>6-AM: 32 ng/mL<br>Codeine: 36 ng/mL   |
|                 | <b>41044</b>         | Cocaine, Heroin, Cannabis         | <i>Positive</i><br>6-AM: 23 ng/mL                                               |
|                 | <b>41045</b>         | Crack cocaine, Heroin             | <i>Positive</i><br>Morphine: 90 ng/mL                                           |
| <b>Group 1b</b> | <b>41037</b>         | Heroin, Cocaine (crack), Diazepam | <i>Negative</i>                                                                 |
|                 | <b>41038</b>         | Heroin, Cocaine                   | <i>Negative</i>                                                                 |
|                 | <b>41046</b>         | Heroin, Cocaine                   | <i>Negative</i>                                                                 |
| <b>Group 2</b>  | <b>41026</b>         | Cocaine                           | <i>Negative</i>                                                                 |
|                 | <b>41028</b>         | Cocaine                           | <i>Negative</i>                                                                 |
| <b>Group 3</b>  | <b>41036</b>         | Cocaine, Morphine                 | <i>Negative</i>                                                                 |
